# Supplementary material for: Cationic surfactant-directed structural control of NaCl crystals from evaporating sessile droplets
Source: Royal Society of Chemistry journal article supplement (doi:10.1039/d1sm01357b), 2021-11-23
Supplement: d1sm01357b2.pdf [file d1sm01357b2.pdf]

# Cationic surfactant–directed structural control of NaCl crystals from evaporating sessile droplets

Jayant K. Dewangan,<sup>a</sup> Nandita Basu<sup>b</sup> and Mithun Chowdhury<sup>a,\*</sup>

<sup>a</sup>Lab of Soft Interfaces, Department of Metallurgical Engineering and Materials Science,  
Indian Institute of Technology Bombay, Mumbai 400076, India

<sup>b</sup>Department of Chemistry, Indian Institute of Technology Bombay, Mumbai 400076, India

\*correspondence to: mithunc@iitb.ac.in

## Electronic Supplementary Information (ESI)

**Table S1**

| Sample | Concentration            | Solution Viscosity (mPa.s)<br>at temperature 24°C |
|--------|--------------------------|---------------------------------------------------|
| 1      | 0.1M NaCl + 0.0001M CTAB | 1.02                                              |
| 2      | 0.1M NaCl + 0.001M CTAB  | 1.05                                              |
| 3      | 0.1M NaCl + 0.01M CTAB   | 1.07                                              |
| 4      | 0.1M NaCl + 0.02M CTAB   | 1.08                                              |
| 5      | 0.1M NaCl + 0.1M CTAB    | 1.15                                              |
| 6      | 0.5M NaCl + 0.0001M CTAB | 1.06                                              |
| 7      | 0.5M NaCl + 0.001M CTAB  | 1.07                                              |
| 8      | 0.5M NaCl + 0.01M CTAB   | 1.11                                              |
| 9      | 0.5M NaCl + 0.02M CTAB   | 1.17                                              |
| 10     | 0.5M NaCl + 0.1M CTAB    | 1.32                                              |
| 11     | 2M NaCl + 0.0001M CTAB   | 1.19                                              |
| 12     | 2M NaCl + 0.001M CTAB    | 1.20                                              |
| 13     | 2M NaCl + 0.01M CTAB     | 1.22                                              |
| 14     | 2M NaCl + 0.02M CTAB     | 1.36                                              |
| 15     | 2M NaCl + 0.1M CTAB      | 1.58                                              |
| 16     | Only CTAB_0.0001M        | 1.01                                              |
| 17     | Only CTAB_0.01M          | 1.04                                              |
| 18     | Only CTAB_0.1M           | 1.14                                              |

**Table S2**

Concentrations of CTAB ( $C_{CTAB}$  in (M)), Equilibrium contact angle, Droplet pinning time ( $t_p$ ), Crystallisation time ( $t_c$ ), their difference ( $t_c-t_p$ ), Solidification time ( $t_s$ ), and Intrinsic contact angle of droplet at time of pinning ( $\theta_{iP}$ ). All the data are obtained for a constant  $C_{NaCl} = 0.1$  (M).

| $C_{CTAB}$ (M) | $\theta_{Eqm.}$ (°) | $t_p$ (min) | $t_c$ (min) | $t_s$ (min) | $t_c-t_p$ (min) | $\theta_{iP}$ (°) |
|----------------|---------------------|-------------|-------------|-------------|-----------------|-------------------|
| 0.0001         | 53.39               | 10.22       | 16.4        | 6.53        | 6.18            | 13.57             |
| 0.001          | 52.12               | 9.02        | 22          | 6.94        | 12.98           | 17.6              |
| 0.01           | 46.79               | 6.2         | 23.06       | 14.14       | 16.86           | 20.38             |
| 0.02           | 26.67               | 1.06        | 23          | 16.27       | 21.94           | 22                |
| 0.1            | 25.33               | 0.5         | 24.2        | 57.1        | 23.7            | 25                |

The characteristics of surfactant-containing inorganic salt solutions are controlled by the total molality of the mixture  $m$ , which can be expressed in the following way

$$m = 2m_1 + 2m_2 \quad (1)$$

Where  $m_1$  and  $m_2$  are the molalities of NaCl and CTAB, respectively. In aqueous solutions, NaCl and CTAB dissociate into ions. Mole fractions ( $x_1$  and  $x_2$ ) of NaCl and CTAB can be given as

$$(x_1) = \frac{2m_1}{m} = \frac{m_1}{(m_1 + m_2)} \quad (2)$$

$$(x_2) = \frac{2m_2}{m} = \frac{m_2}{(m_1 + m_2)} \quad (3)$$

The values of  $m_1$ ,  $m_2$ ,  $x_1$  and  $x_2$  for different surfactant concentrations containing 0.1 (M) NaCl solution are calculated and given in Table S1. Similarly, Table S2 and S3 are followed for 0.5 (M) and 2 (M) NaCl solutions, respectively.

**Table S3**

|                |     |       |        |        |        |
|----------------|-----|-------|--------|--------|--------|
| $C_{NaCl}$ (M) | 0.1 | 0.1   | 0.1    | 0.1    | 0.1    |
| $C_{CTAB}$     | 0.1 | 0.02  | 0.01   | 0.001  | 0.0001 |
| $m$            | 0.4 | 0.24  | 0.22   | 0.202  | 0.2002 |
| $x_1$          | 0.5 | 0.833 | 0.909  | 0.990  | 0.9990 |
| $x_2$          | 0.5 | 0.167 | 0.0909 | 0.0099 | 0.0009 |

**Table S4**

Concentrations of CTAB ( $C_{CTAB}$  in (M)), Equilibrium contact angle, Droplet pinning time ( $t_p$ ), Droplet crystallisation time ( $t_c$ ), their difference ( $t_c-t_p$ ), Droplet solidification time ( $t_s$ ), and Intrinsic contact angle of droplet at pinning ( $\theta_{IP}$ ). All the data are obtained for a constant  $C_{NaCl} = 0.5$  (M).

| $C_{CTAB}$ (M) | $\theta_{Eqm.} (^{\circ})$ | $t_p$ (min) | $t_c$ (min) | $t_s$ (min) | $t_c-t_p$ (min) | $\theta_{IP} (^{\circ})$ |
|----------------|----------------------------|-------------|-------------|-------------|-----------------|--------------------------|
| 0.0001         | 50                         | 11.44       | 16          | 10.1        | 4.56            | 13.45                    |
| 0.001          | 51.7                       | 10.38       | 17.13       | 14.6        | 6.75            | 18                       |
| 0.01           | 44                         | 4.4         | 18.93       | 16.53       | 14.53           | 26.38                    |
| 0.02           | 37                         | 1.32        | 20.01       | 18.1        | 18.69           | 30                       |
| 0.1            | 34                         | 0.6         | 27.17       | 23.5        | 26.57           | 34                       |

**Table S5**

|                |       |        |        |         |          |
|----------------|-------|--------|--------|---------|----------|
| $C_{NaCl}$ (M) | 0.5   | 0.5    | 0.5    | 0.5     | 0.5      |
| $C_{CTAB}$     | 0.1   | 0.02   | 0.01   | 0.001   | 0.0001   |
| m              | 1.2   | 1.04   | 1.02   | 1.002   | 1.0002   |
| $x_1$          | 0.833 | 0.9615 | 0.9804 | 0.9980  | 0.9998   |
| $x_2$          | 0.167 | 0.0385 | 0.0196 | 0.00199 | 0.000199 |

**Table S6**

Concentrations of CTAB ( $C_{CTAB}$  in (M)), Equilibrium contact angle, Droplet pinning time ( $t_p$ ), Droplet crystallisation time ( $t_c$ ), their difference ( $t_c-t_p$ ), Droplet solidification time ( $t_s$ ), and Intrinsic contact angle of droplet at pinning ( $\theta_{IP}$ ). All the data are obtained for a constant  $C_{NaCl} = 2$  (M).

| $C_{CTAB}$ (M) | $\theta_{Eqm.} (^{\circ})$ | $t_p$ (min) | $t_c$ (min) | $t_s$ (min) | $t_c-t_p$ (min) | $\theta_{IP} (^{\circ})$ |
|----------------|----------------------------|-------------|-------------|-------------|-----------------|--------------------------|
| 0.0001         | 50.6                       | 27          | 27.73       | 30.07       | 0.73            | 15.26                    |
| 0.001          | 49.2                       | 16.02       | 22.24       | 29.56       | 6.04            | 16                       |
| 0.01           | 49                         | 7.22        | 18.6        | 25.07       | 11.38           | 26.9                     |
| 0.02           | 47                         | 4.56        | 17          | 24.37       | 12.44           | 29.7                     |
| 0.1            | 32                         | 0.3         | 12.9        | 6           | 12.6            | 32                       |

**Table S7**

|                |        |         |         |         |          |
|----------------|--------|---------|---------|---------|----------|
| $C_{NaCl}$ (M) | 2      | 2       | 2       | 2       | 2        |
| $C_{CTAB}$     | 0.1    | 0.02    | 0.01    | 0.001   | 0.0001   |
| m              | 4.2    | 4.04    | 4.02    | 4.002   | 4.0002   |
| $x_1$          | 0.952  | 0.9900  | 0.9950  | 0.9995  | 0.99995  |
| $x_2$          | 0.0476 | 0.00990 | 0.00497 | 0.00049 | 0.000049 |

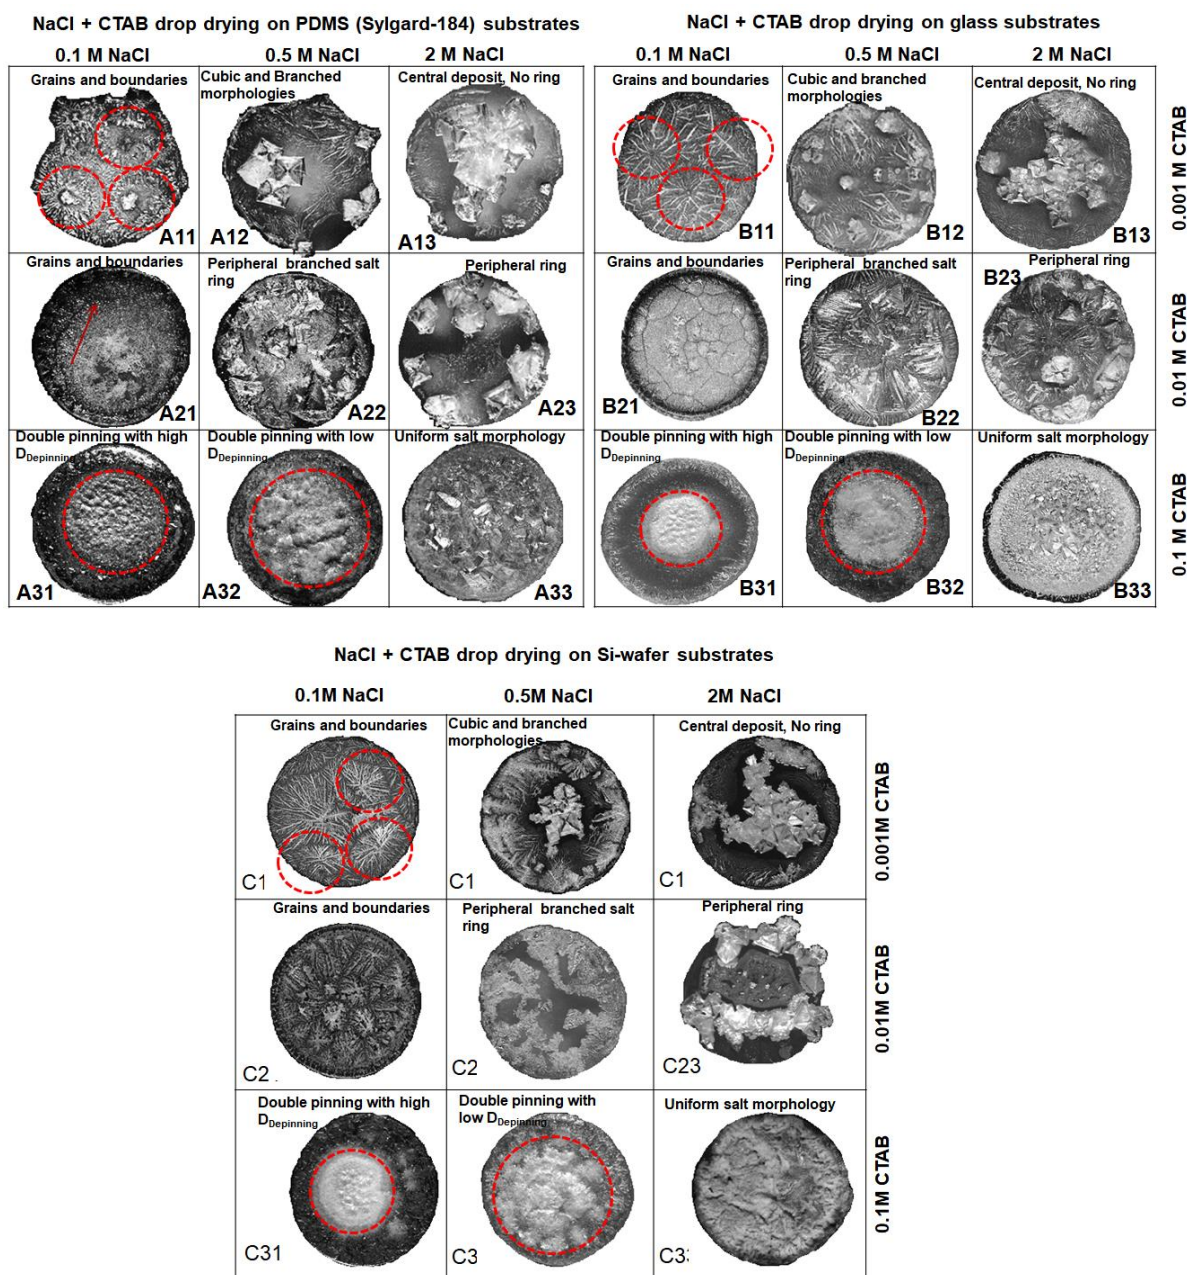

**Figure S1:** Evaporative drying of CTAB containing NaCl solution droplets on cross-linked PDMS Sylgard 184® substrates (A11 to A33), on glass substrates (B11 to B33), and on Si/SiO<sub>x</sub> (100) wafer substrate (C11 to C33). Dried deposit diameter on the glass and Si/SiO<sub>x</sub> (100) wafer substrates is ca. 2.6 mm, and the same on the cross-linked PDMS substrate is ca. 1.2 mm.

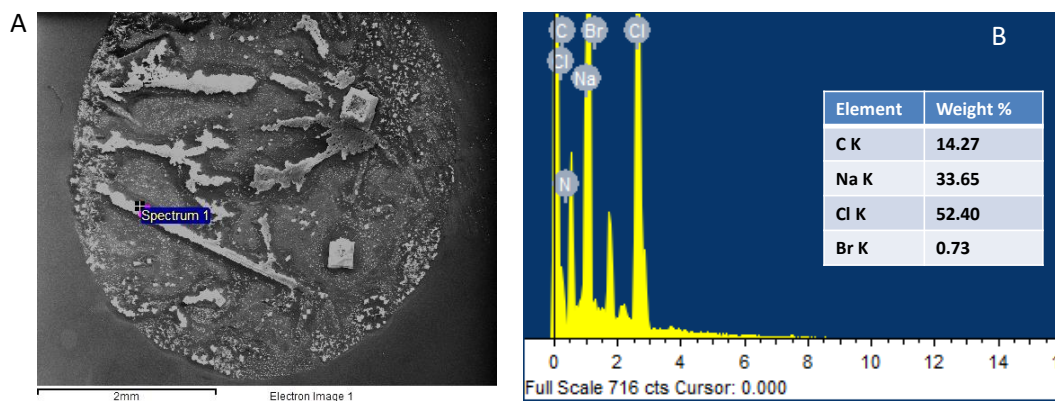

**Figure S2:** EDS measurement on the mm-long skeletal morphologies. It indicates that Na and Cl are the main components of such skeletal crystals.

### List of supporting movies

| #  | Movie Particulars                   | Real total run time (s) |
|----|-------------------------------------|-------------------------|
| 1  | Movie 1: 0.1 M NaCl + 0.0001M CTAB  | 1376                    |
| 2  | Movie 2: 0.1 M NaCl + 0.001 M CTAB  | 1736                    |
| 3  | Movie 3: 0.1 M NaCl + 0.01 M CTAB   | 2232                    |
| 4  | Movie 4: 0.1 M NaCl + 0.1 M CTAB    | 4878                    |
| 5  | Movie 5: 0.5 M NaCl + 0.0001 M CTAB | 1566                    |
| 6  | Movie 6: 0.5 M NaCl + 0.001 M CTAB  | 1904                    |
| 7  | Movie 7: 0.5 M NaCl + 0.01 M CTAB   | 2128                    |
| 8  | Movie 8: 0.5 M NaCl + 0.02 M CTAB   | 2287                    |
| 9  | Movie 9: 0.5 M NaCl + 0.1 M CTAB    | 3040                    |
| 10 | Movie 10: 2 M NaCl + 0.001 M CTAB   | 3108                    |
| 11 | Movie 11: 2 M NaCl + 0.01 M CTAB    | 2620                    |
| 12 | Movie 12: 2 M NaCl + 0.02 M CTAB    | 2482                    |
| 13 | Movie 13: 2 M NaCl + 0.1 M CTAB     | 1134                    |
